# Supplementary material
Source: Springer Nature journal article supplement (https://www.springerprofessional.de/resource/supplementary/13638_2014_1024_MOESM15_ESM.pdf/11899074)

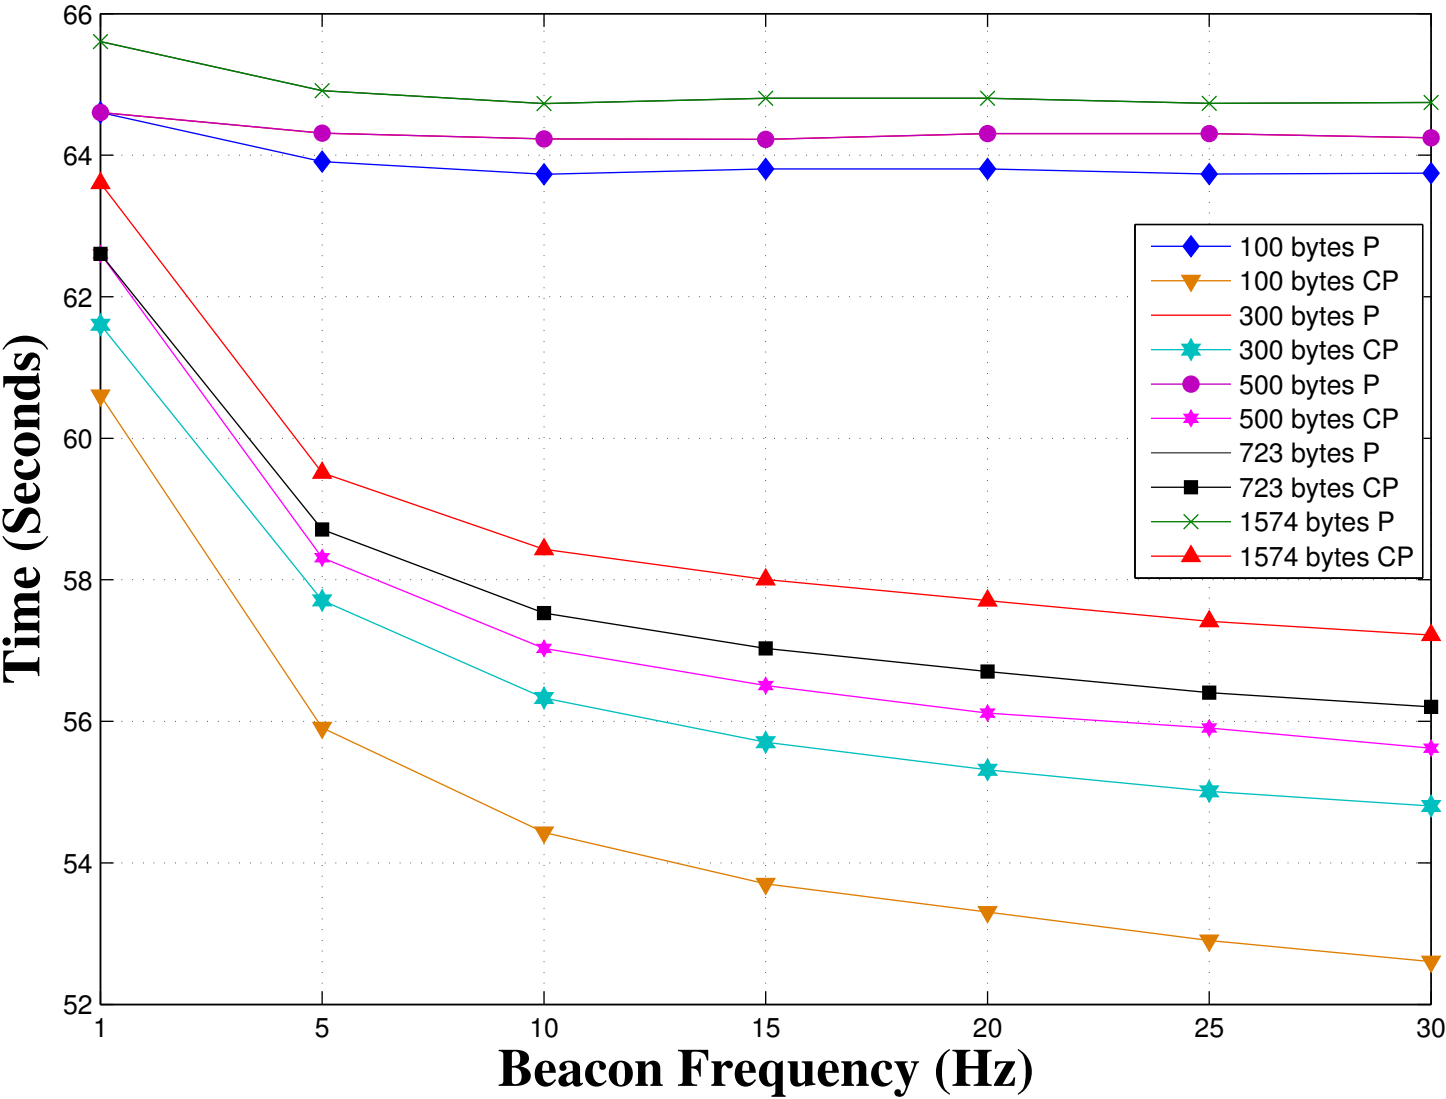

Supplement: MOESM15 [file 11899074]
